# Supplementary material
Source: publisher figshare collection journal article supplement (https://gsajournals.figshare.com/ndownloader/files/35005852)
Supplement: Supplementary file 1 [file 35005852]

| **locus** | **forward primer** | **reverse primer** | **amplicon** |
| --- | --- | --- | --- |
| *yellow* | CGTTTGCTTTTCTTCCATCC | ACTTCGGCTGTTGAATGTCC | 140 |
| *tan* | AAACTTTGGAAGCCGTTCGC | CGTCCAAGTGCAGCAAGAAC | 111 |
| *ebony* | TAGCCGCCGGATATGTGAAC | CTGCCCTCGAATATCAGCGT | 139 |
| *aaNAT* | CCGTGGCTAGTTTGGGAGG | TACACAAGAATGCGGGGGTT | 110 |
| *white* | CGTACTTTGGAGATCGTGGCT | CAGAACCCATGAAGCAAGCG | 137 |
| *scarlet* | GCTGGTACTACGGAGGAAGC | TTCAGCCCCTGGTATTGGTG | 117 |
| *okA* | TCCGCACTGGTGTTTTGGAT | AGCAGCCATAAGCTGTAGCA | 109 |
| *okB* | CTGTTGCGGCAGTTAAGCAG | TGGCACCGTTTACTTCACCA | 145 |
| *cinnabar* | TGCTGCTCATGCAATGGTTC | CTTAGAGCATCTCCGACGCTA | 117 |
| *Ef1* | GATTCCACTGAACCGCCTT | GCCGGGTTATATCCGATTTT | 92 |

**Table S2.** Primers used for RT-qPCR. *Ef1* was used as endogenous reference gene as in Berni et al, 2014.
